# Supplementary material for: Fluorescent discrimination of cysteine, homocysteine, and glutathione in urine samples using a novel seleno-BODIPY probe
Source: Royal Society of Chemistry journal article supplement (doi:10.1039/d4tb01539h), 2024-01-01
Supplement: d4tb01539h1.pdf [file d4tb01539h1.pdf]

## Supplementary Material

### Fluorescent Discrimination of Cysteine, Homocysteine, and Glutathione in Urine Samples Using a novel Seleno-BODIPY Probe

Beatriz S. Cugnasca<sup>a,b</sup>, Hugo M. Santos<sup>b,c</sup>, Frederico Duarte<sup>b</sup>, José Luis Capelo-Martínez<sup>b,c</sup>, ,  
Alcindo A. Dos Santos <sup>a\*</sup>, Carlos Lodeiro<sup>b,c\*\*</sup>

<sup>a</sup>*Institute of Chemistry, Department of Fundamental Chemistry, University of São Paulo, 05508-900  
São Paulo, SP, Brazil*

<sup>b</sup>*BIOSCOPE Research Group, LAQV-REQUIMTE, Department of Chemistry, NOVA-FCT, NOVA  
University Lisbon, 2829-516 Caparica, Portugal*

<sup>c</sup>*PROTEOMASS Scientific Society, Praceta Jeronimo Dias, 12, 2A, Sto Antonio de Caparica, 2825-  
466 Costa da Caparica, Portugal*

Corresponding authors: \*alcindo@iq.usp.br and \*\*cle@fct.unl.pt

### Summary

|                                                       |    |
|-------------------------------------------------------|----|
| 1. Photophysical Studies.....                         | 02 |
| 2. Recovery values of biothiols in urine samples..... | 13 |
| 3. Structural characterization of BODIPYs.....        | 16 |
| 4. References.....                                    | 23 |

## 1. Photophysical Studies

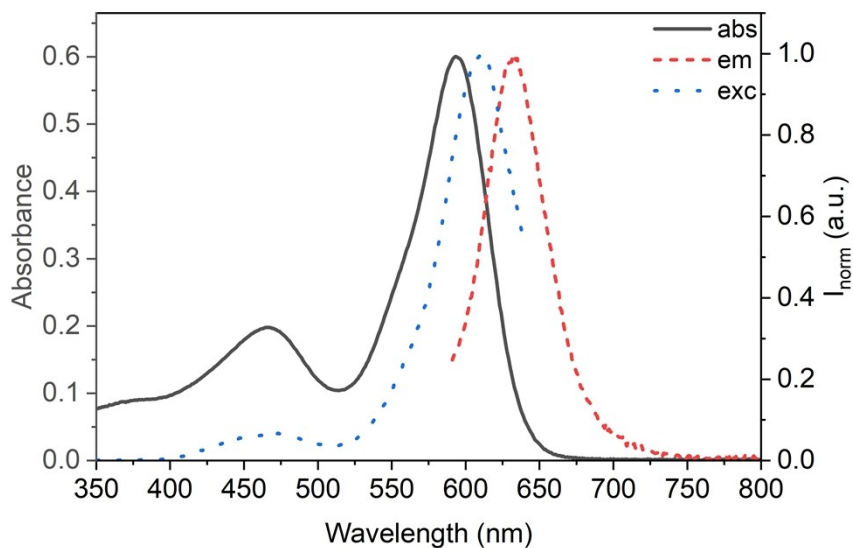

**Figure S1.** Absorption, emission, and excitation spectra of **Se-BODIPY** (12  $\mu\text{mol/L}$ ) in 40% DMSO/H<sub>2</sub>O.  $\lambda_{\text{ex}} = 570 \text{ nm}$ ,  $\lambda_{\text{em}} = 650 \text{ nm}$ , slit 5.0 / 5.0 nm.

| Table S1. Photophysical data of <b>Se-BODIPY</b> in 40% DMSO in H <sub>2</sub> O (v/v) at 298 K |                                                     |                          |                            |                   |                         |        |
|-------------------------------------------------------------------------------------------------|-----------------------------------------------------|--------------------------|----------------------------|-------------------|-------------------------|--------|
| Absorption data                                                                                 |                                                     |                          | Emission data              |                   |                         |        |
| $\lambda_{\text{abs}}$ (nm)                                                                     | $\epsilon$ (L.mol <sup>-1</sup> .cm <sup>-1</sup> ) | Fwhm <sub>abs</sub> (nm) | $\lambda_{\text{em}}$ (nm) | Stokes shift (nm) | Fwhm <sub>em</sub> (nm) | $\Phi$ |
| 593                                                                                             | 50200.6988                                          | 60.366                   | 633                        | 40                | 50.019                  | < 0.01 |
| 465                                                                                             | 16575.4703                                          | 118.071                  |                            |                   |                         |        |

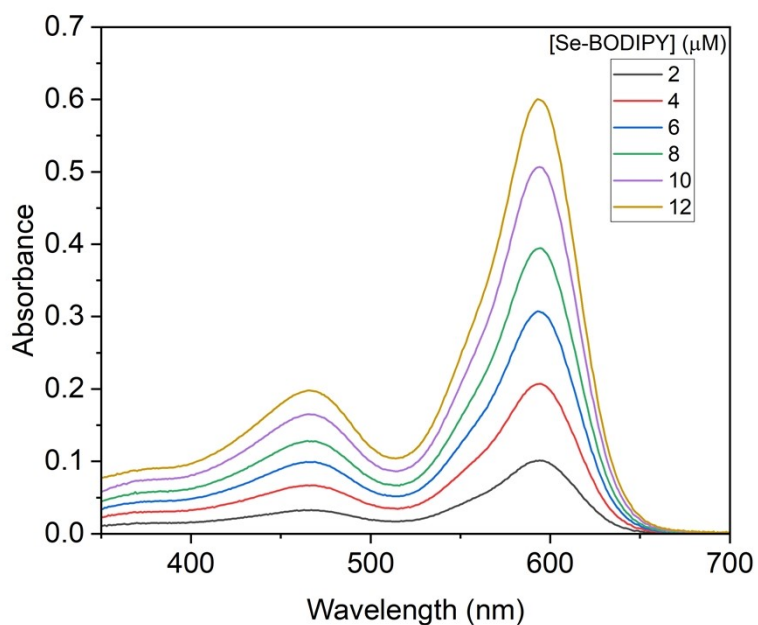

**Figure S2.** Absorption spectra of **Se-BODIPY** at different concentrations in 40% DMSO in water.

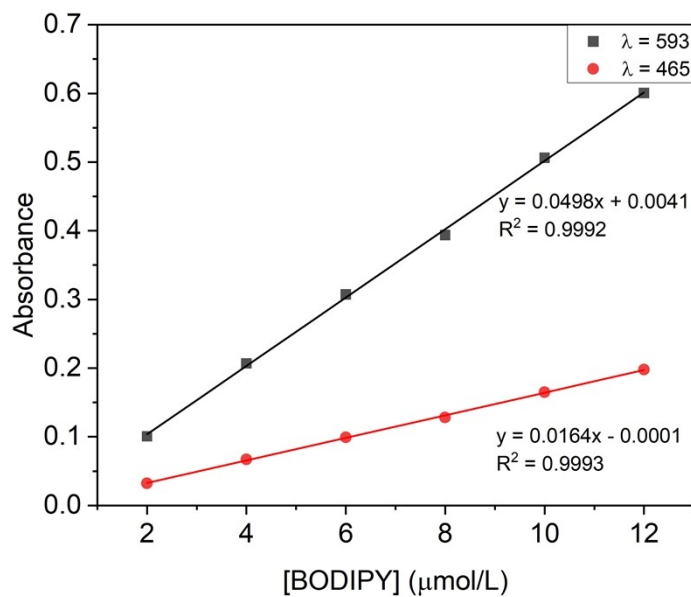

**Figure S3.** Absorbance at  $\lambda = 593$  nm and  $\lambda = 465$  nm as a function of Se-BODIPY concentration.

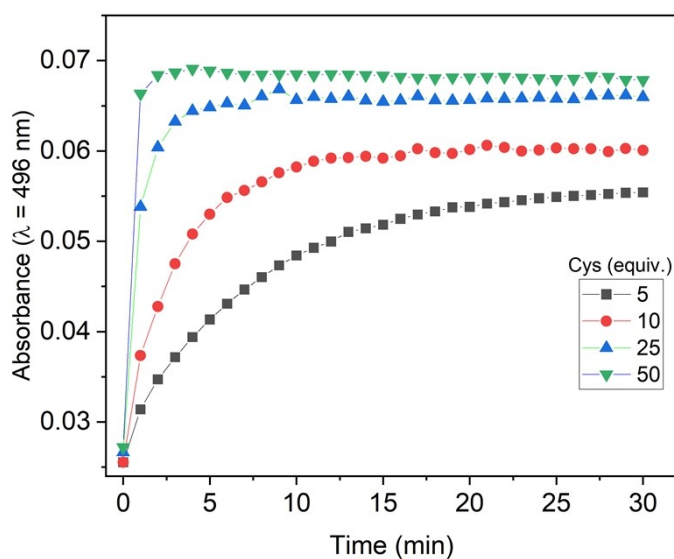

**Figure. S4.** Absorption kinetics of BODIPY Se-BODIPY (2 μmol/L) when in the presence of different concentrations (5, 10, 25 and 50 equiv.) of Cys (Abs = 496 nm) in 40% DMSO in water.

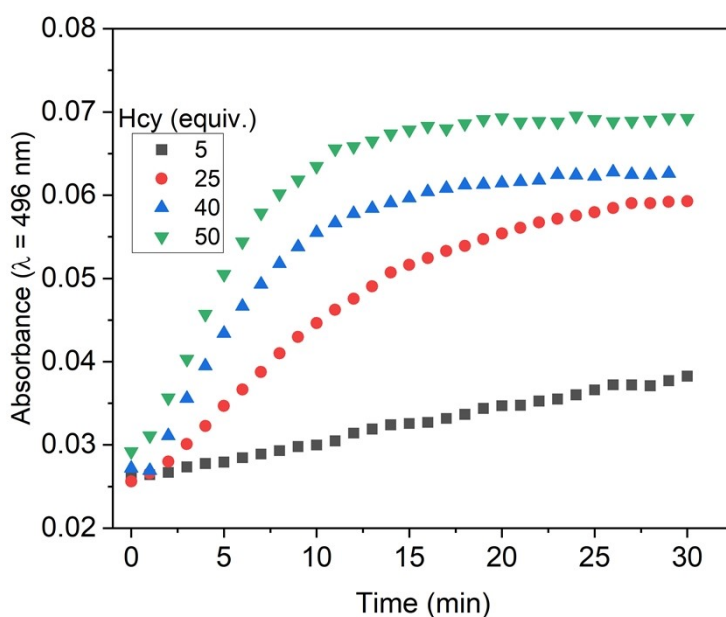

**Figure. S5.** Absorption kinetics of BODIPY Se-BODIPY (2  $\mu\text{mol/L}$ ) when in the presence of different concentrations (5, 25, 40, and 50 equiv.) of Hcy (Abs = 496 nm) in 40% DMSO in water.

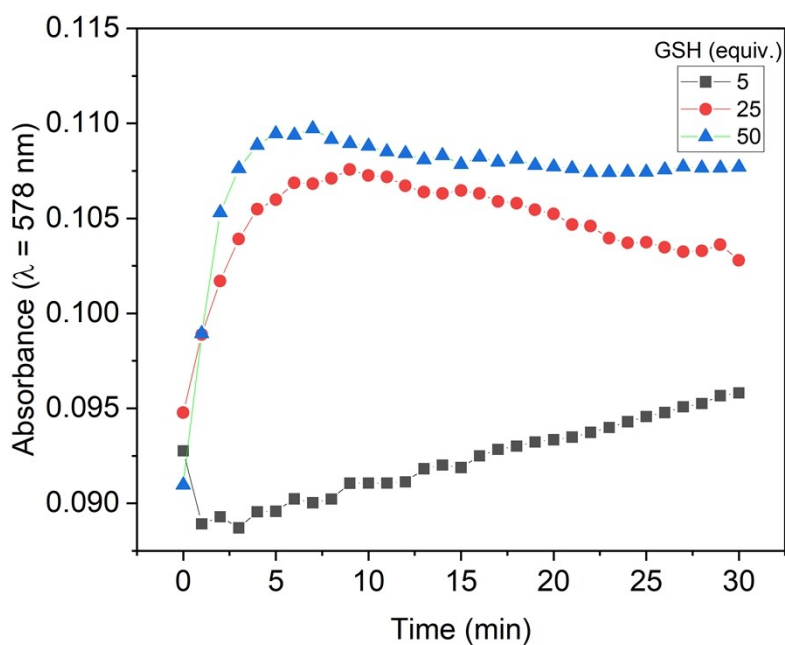

**Figure. S6.** Absorption kinetics of BODIPY Se-BODIPY (2  $\mu\text{mol/L}$ ) when in the presence of different concentrations (5, 25, and 50 equiv.) of GSH (Abs = 578 nm) in 40% DMSO in water.

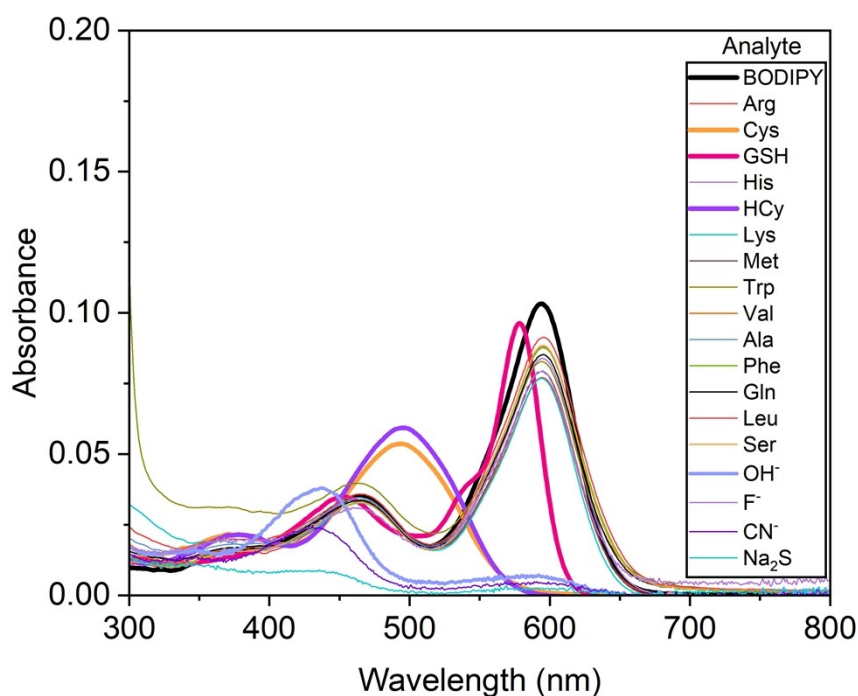

**Figure. S7.** Absorption spectra of **Se-BODIPY** (2  $\mu\text{mol/L}$ ) when in the presence of 50 equiv. (100  $\mu\text{mol/L}$ ) of analytes in 40% DMSO in water. Analytes: Cys, Hcy, GSH, Arg, His, Lys, Met, Trp, Val, Ala, Phe, Gln, Leu, Ser,  $\text{OH}^-$ ,  $\text{F}^-$ ,  $\text{CN}^-$ , and  $\text{Na}_2\text{S}$ .

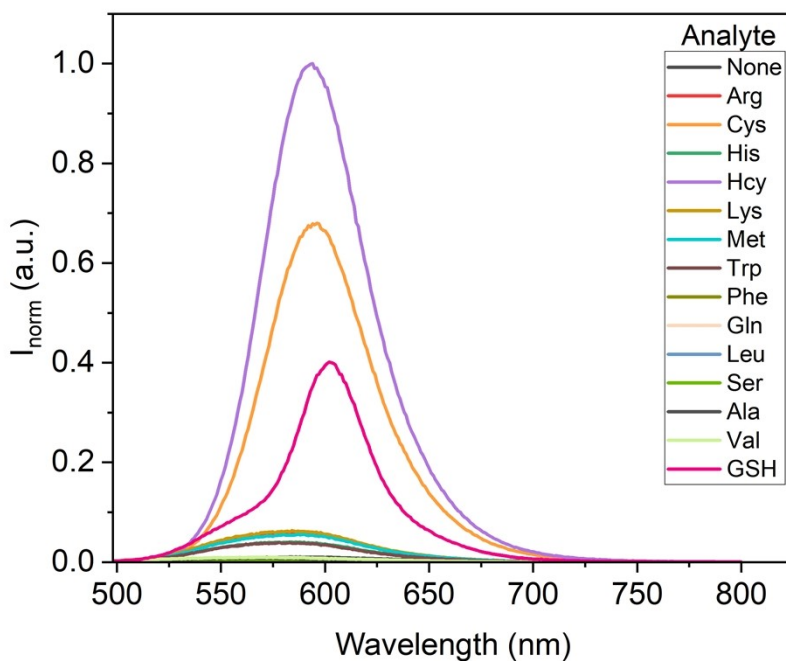

**Figure. S8.** Emission spectra of **Se-BODIPY** (2  $\mu\text{mol/L}$ ) when in the presence of 50 equiv. (100  $\mu\text{mol/L}$ ) of analytes in 40% DMSO in water. Analytes: Cys, Hcy, GSH, Arg, His, Lys, Met, Trp, Val, Ala, Phe, Gln, Leu, Ser.  $\lambda_{\text{ex}} = 488 \text{ nm}$ , slit 2.5.

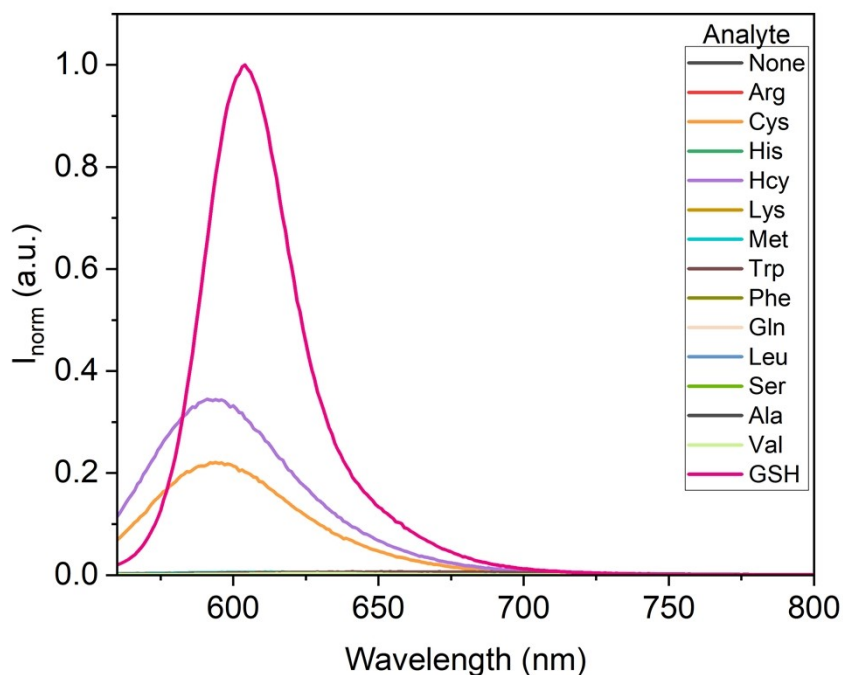

**Figure. S9.** Emission spectra of **Se-BODIPY** (2  $\mu\text{mol/L}$ ) when in the presence of 50 equiv. (100  $\mu\text{mol/L}$ ) of analytes in 40% DMSO in water. Analytes: Cys, Hcy, GSH, Arg, His, Lys, Met, Trp, Val, Ala, Phe, Gln, Leu, Ser.  $\lambda_{\text{ex}} = 550 \text{ nm}$ , slit 2.5

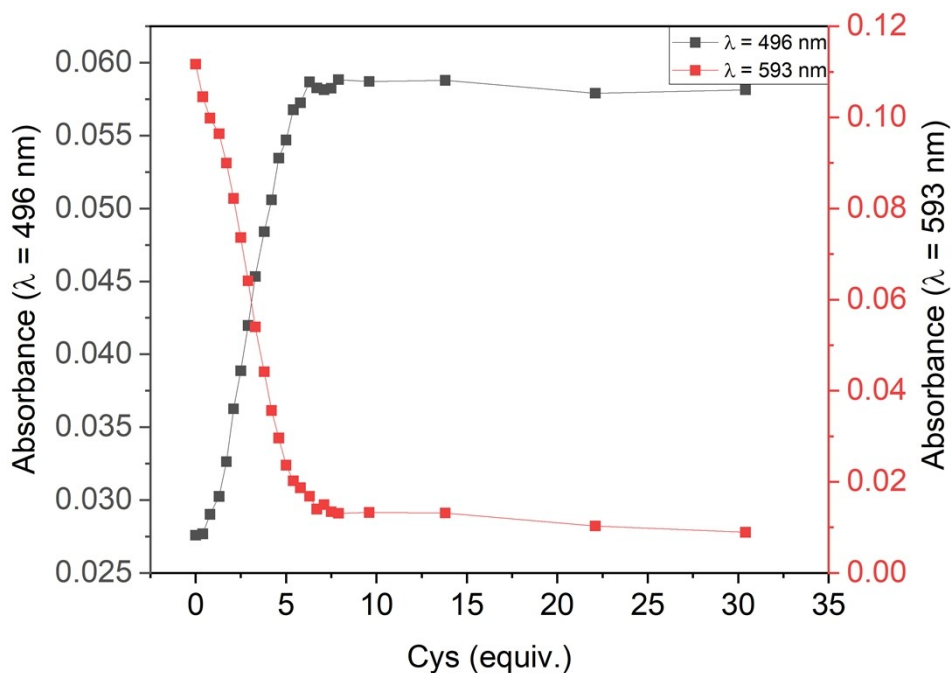

**Figure. S10.** Correlation between absorbance of **Se-BODIPY** (2  $\mu\text{mol/L}$ ) ( $\lambda = 496 \text{ nm}$  and  $\lambda = 593 \text{ nm}$ ) and [Cys] in 40% DMSO in water.

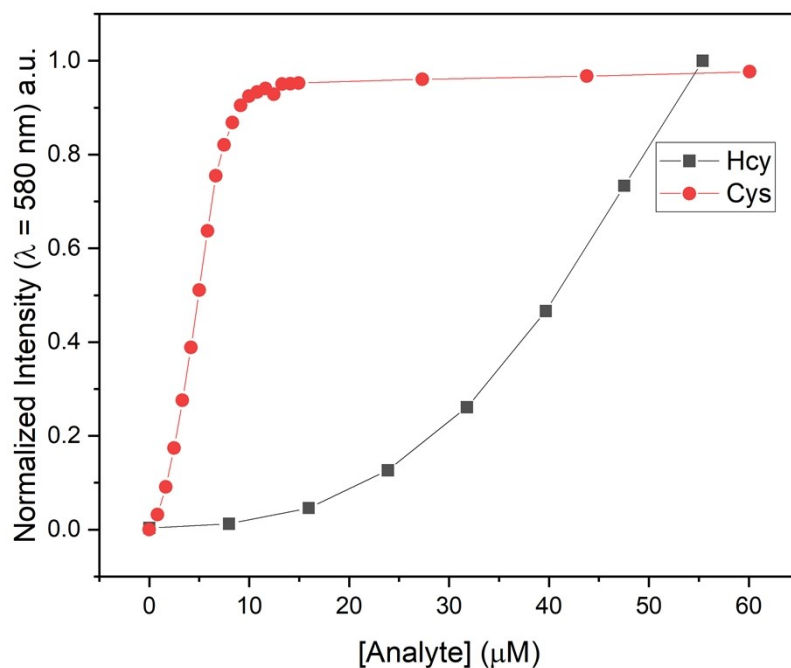

**Figure. S11.** Correlation between emission ( $\lambda = 580$  nm) of Se-BODIPY (2  $\mu\text{mol/L}$ ) and [Cys] or [Hcy] in 40% DMSO in water.

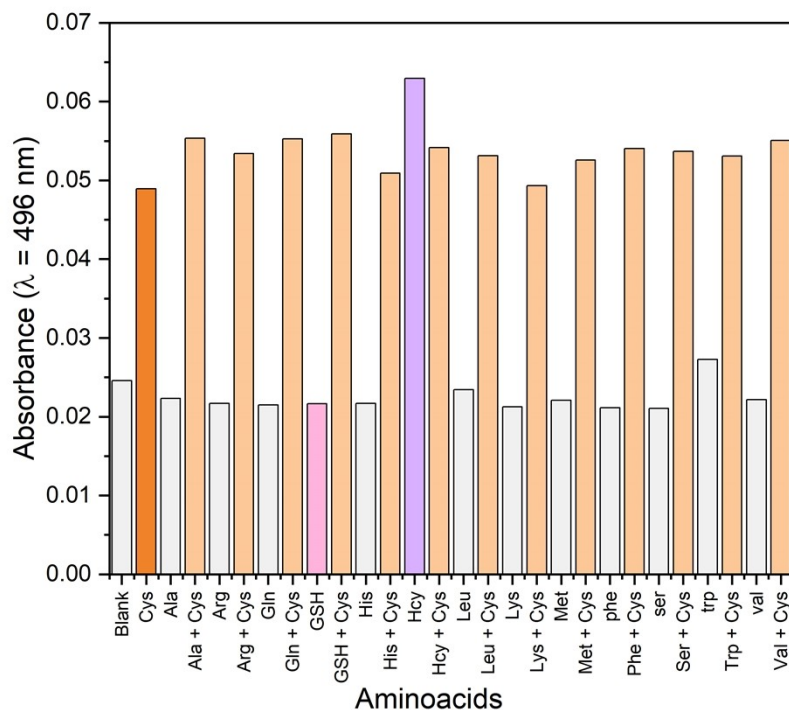

**Figure. S12.** Competition study of the reaction of Se-BODIPY (2  $\mu\text{mol/L}$ ) with Cys (5 equiv.) in the presence of other analytes (5 equiv.) by absorption ( $\lambda = 496$  nm) in 40% DMSO/H<sub>2</sub>O.

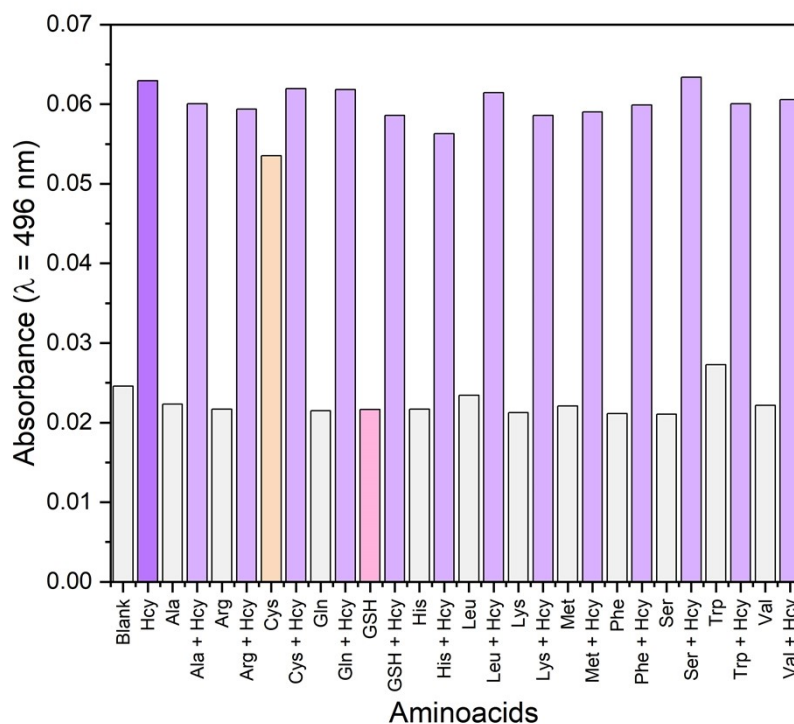

**Figure. S13.** Competition study of the reaction of **Se-BODIPY** ( $2 \mu\text{mol/L}$ ) with Hcy (50 equiv.) in the presence of other analytes (50 equiv.) by absorption ( $\lambda = 496 \text{ nm}$ ) in 40% DMSO/ $\text{H}_2\text{O}$ .

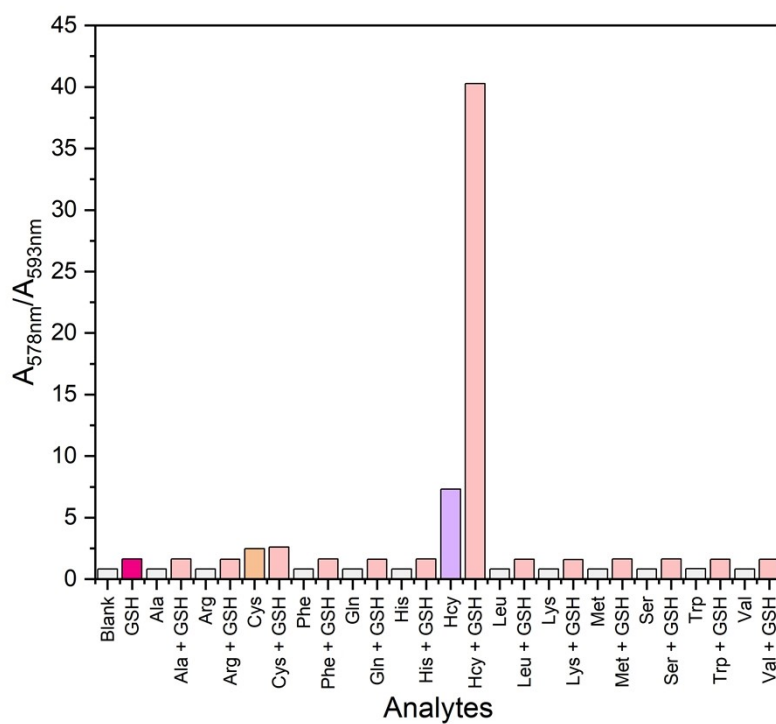

**Figure. S14.** Competition study of the reaction of **Se-BODIPY** ( $2 \mu\text{mol/L}$ ) with GSH (50 equiv.) in the presence of other analytes (50 equiv.) by absorption ( $A_{578\text{nm}}/A_{593\text{nm}}$ ) in 40 % DMSO/ $\text{H}_2\text{O}$ .



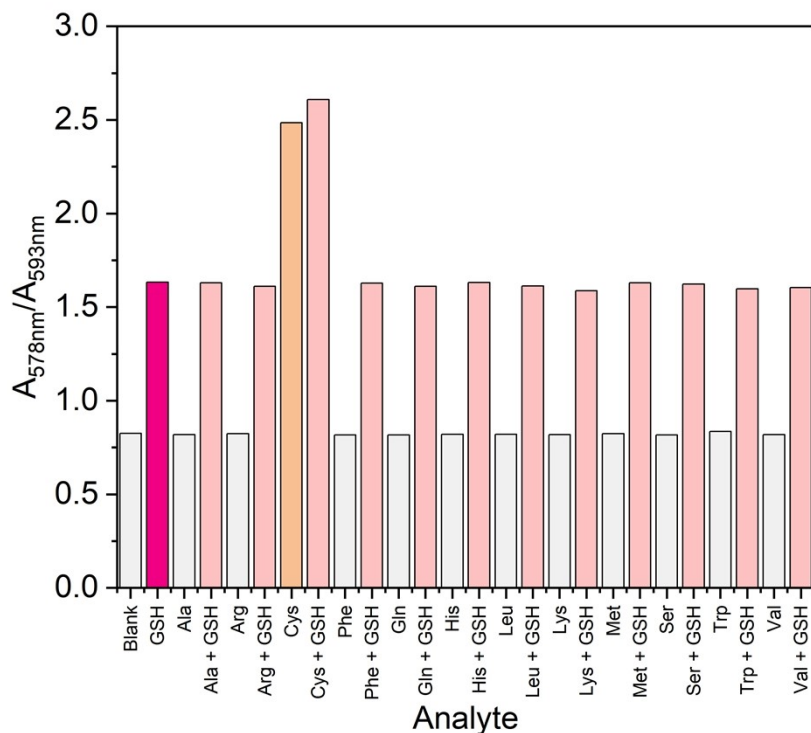

**Figure. S15.** Competition study of the reaction of **Se-BODIPY** ( $2 \mu\text{mol/L}$ ) with GSH (50 equiv.) in the presence of other analytes (50 equiv.) by emission ( $\lambda = 615 \text{ nm}$ ;  $\lambda_{\text{ex}} = 550 \text{ nm}$  and slit 2.5 nm) in 40% DMSO/ $\text{H}_2\text{O}$ .

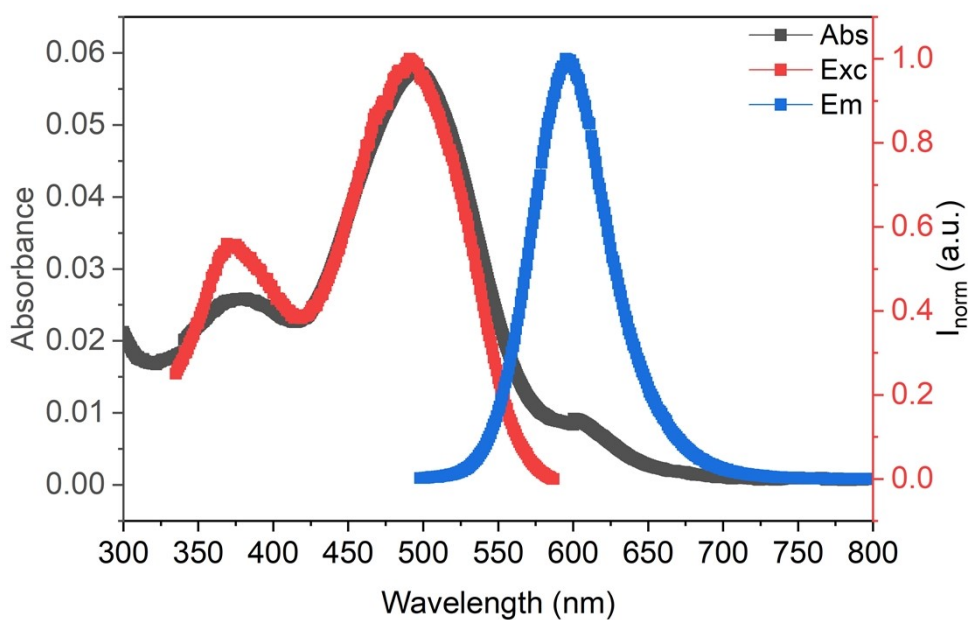

**Figure. S16.** Absorption, emission and excitation wavelength of the product **7** obtained after reaction between **Se-BODIPY** and Cys, in 40% DMSO in  $\text{H}_2\text{O}$ .  $\lambda_{\text{ex}} = 488 \text{ nm}$ , slit 2.5.

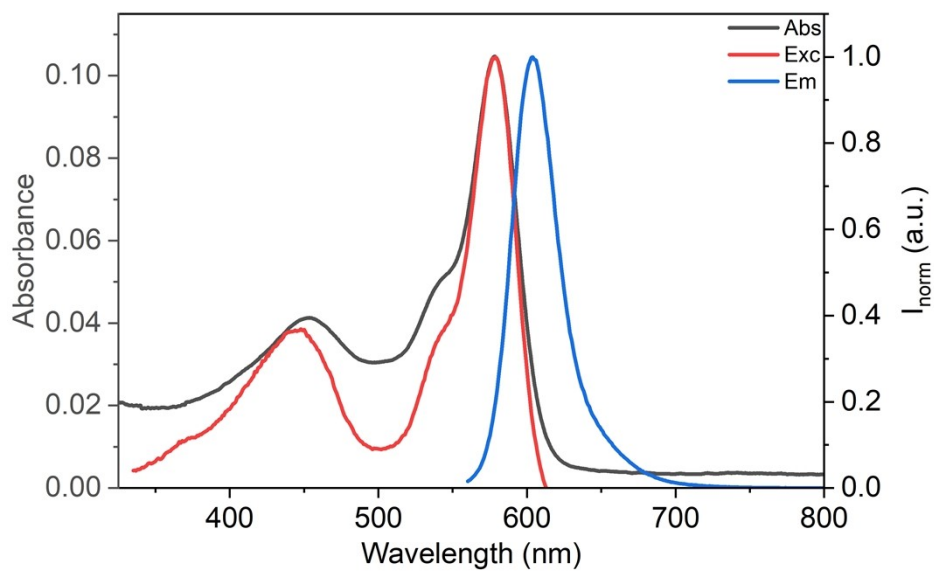

**Figure. S17.** Absorption, emission and excitation wavelength of the product **9** obtained after reaction between **Se-BODIPY** and GSH, in 40% DMSO in H<sub>2</sub>O.  $\lambda_{ex} = 550$  nm, slit 2.5

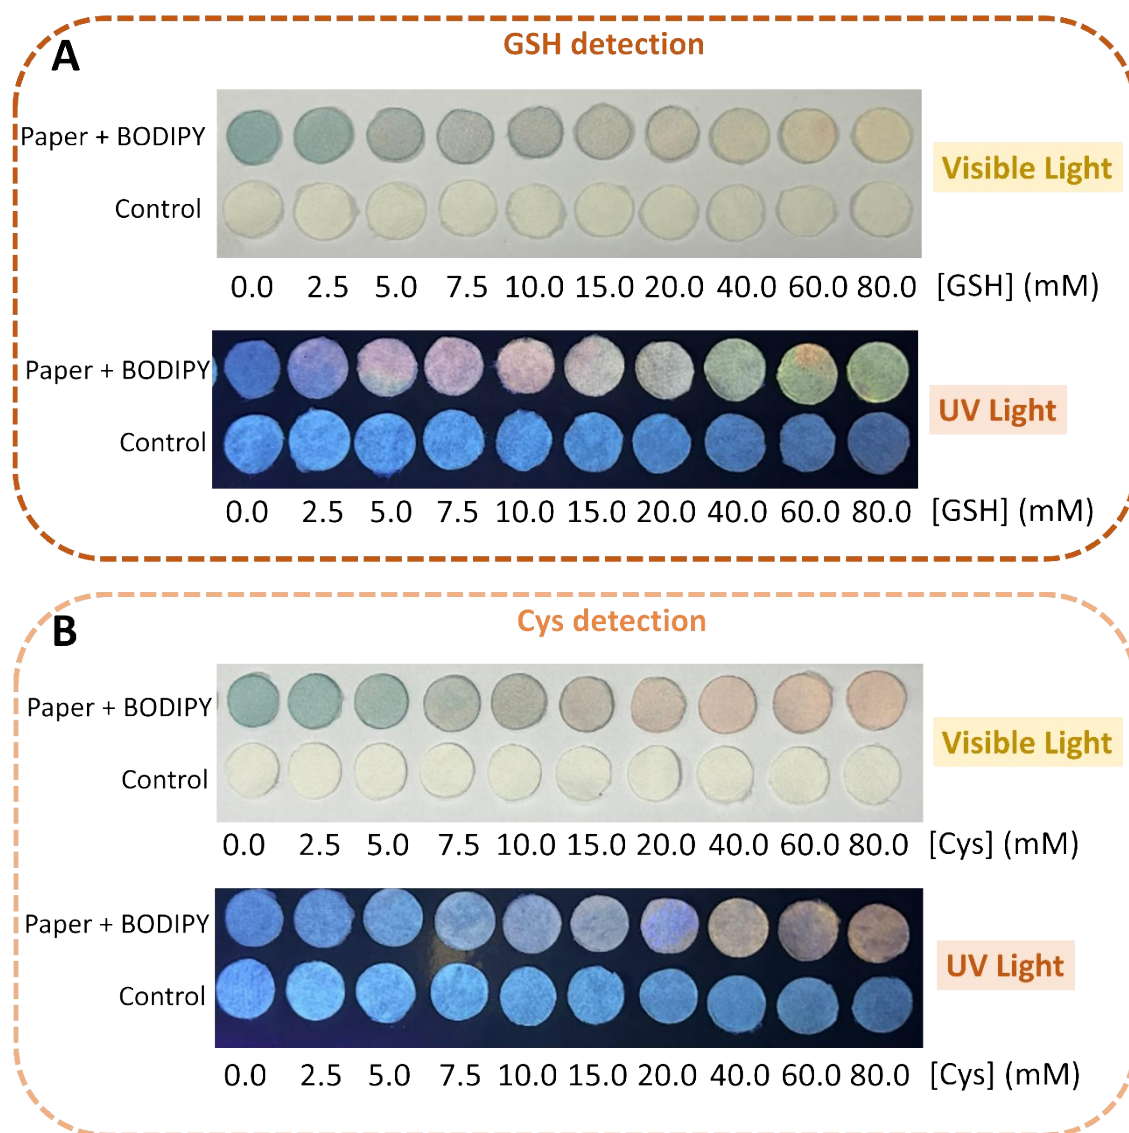

**Figure S18.** Paper discs containing **Se-BODIPY** ( $5 \cdot 10^{-4}$  mol/L) after reaction with different concentrations of **A)** GSH (after 2h reaction) and **B)** Cys (after 1h reaction) under visible light (top) and UV light (bottom). Obs: Control experiments were conducted by immersing paper discs without BODIPY in Cys or GSH solutions with different concentrations.

**Table S2.** Comparison of **Se-BODIPY** with other reported probes based on BODIPYs for detection of Cys, Hcy or GSH.

| Solvent                                                            | LOD Cys ( $\mu\text{M}$ ) | LOD Hcy ( $\mu\text{M}$ ) | LOD GSH ( $\mu\text{M}$ ) | Application                                                              | Ref.      |
|--------------------------------------------------------------------|---------------------------|---------------------------|---------------------------|--------------------------------------------------------------------------|-----------|
| PBS (10 mM, pH 7.4, 10 % DMSO)                                     | 0.64                      | ---                       | ---                       | Images in HepG2 cells                                                    | 1         |
| PBS/MeCN (9/1, v/v)                                                | ---                       | ---                       | 0.0017                    | Images in HepG2 cells                                                    | 2         |
| PBS (0.1% F127 and 0.1% DMSO)                                      | ---                       | ---                       | 3.4                       | Images in A549 cells                                                     | 3         |
| MeCN/PBS buffer (4:6, v/v, pH 7.4, 10 mM)                          | 0.072                     | ---                       | ---                       | Images in HeLa cells and <i>in vivo</i>                                  | 4         |
| PBS/MeCN (v/v = 1:1, pH 7.4, 10 mM)                                | 0.0112                    | ---                       | ---                       | Images in HepG2 cells, <i>in vivo</i> and quantification in food samples | 5         |
| MeCN/HEPES buffer (1:2 v/v, 20 mM, pH 7.4)                         | 0.67                      | ---                       | ---                       | Images in HeLa cells and quantification in urine samples                 | 6         |
| DMSO/PBS (v/v = 3/7, pH 7.4)                                       | 0.020                     | ---                       | 0.034                     | Images in HeLa cells and quantification in food samples                  | 7         |
| PBS/DMSO (v/v = 1:1, pH 7.4, 10 mM)                                | 0.049                     | ---                       | ---                       | Quantification in food samples and images <i>in vivo</i>                 | 8         |
| DMF/H <sub>2</sub> O (1:9 v/v, 10 mM HEPES buffer, pH 8.0).        | 0.029                     | ---                       | ---                       | Removal of Hg <sup>2+</sup> from water                                   | 9         |
| PBS buffer (pH 7.4, 1% DMSO)                                       | ---                       | ---                       | 0.0023                    | Images in HepG2 cells                                                    | 10        |
| MeCN (1 : 1 v/v, PBS)                                              | 0.0627                    | ---                       | ---                       | ---                                                                      | 11        |
| 10 mM PBS (pH = 7.4)                                               | 2.29                      | ---                       | 1.37                      | Images in HepG2 cells                                                    | 12        |
| 10 mM PBS (pH 7.4, containing 50 % MeCN)                           | 0.118                     | ---                       | ---                       | Images in HeLa cells and <i>in vivo</i>                                  | 13        |
| PBS (pH 7.4, 10 mM, containing 40% MeCN)                           | 0.052                     | 0.071                     | ---                       | Images in HeLa cells                                                     | 14        |
| MeCN /PBS buffer (1: 1, v/v, 10 mM, pH 7.4)                        | 0.044                     | 0.063                     | ---                       | Images in HeLa cells                                                     | 15        |
| MeCN and 20 mmol.L <sup>-1</sup> HEPES buffer (1:1, v/v, pH = 7.4) | 0.147                     | 0.087                     | 0.129                     | Images in HeLa cells                                                     | 16        |
| DMSO (40% v/v in H <sub>2</sub> O)                                 | 0.8                       | 20.4                      | 35.9                      | Quantification in human urine samples                                    | This work |

## 2. Recovery values of biothiols in urine samples

**Table S3.** The recovery values of spiked Cys, Hcy, and GSH in real human urine samples by absorbance

| Urine Sample | Cys                      |                            |              | Hcy                      |                            |              |
|--------------|--------------------------|----------------------------|--------------|--------------------------|----------------------------|--------------|
|              | Spiked ( $\mu\text{M}$ ) | Recovery ( $\mu\text{M}$ ) | Recovery (%) | Spiked ( $\mu\text{M}$ ) | Recovery ( $\mu\text{M}$ ) | Recovery (%) |
| 1            | 15.0                     | 17.8 $\pm$ 0.2             | 118          | 20.0                     | 13.4 $\pm$ 0.8             | 67           |
|              | 17.5                     | 19.6 $\pm$ 0.1             | 112          | 21.2                     | 16 $\pm$ 1                 | 76           |
|              | 20.0                     | 21.22 $\pm$ 0.01           | 106          | 25.2                     | 20.4 $\pm$ 0.7             | 81           |
| 2            | 15.0                     | 16.1 $\pm$ 0.5             | 107          | 20.0                     | 15.8 $\pm$ 0.2             | 79           |
|              | 17.5                     | 19.1 $\pm$ 0.6             | 109          | 21.2                     | 17.50 $\pm$ 0.01           | 83           |
|              | 20.0                     | 18.1 $\pm$ 0.5             | 91           | 25.2                     | 21.6 $\pm$ 0.6             | 86           |
| 3            | 15.0                     | 13.4 $\pm$ 0.2             | 89           | 20.0                     | 17.1 $\pm$ 0.2             | 85           |
|              | 17.5                     | 18.0 $\pm$ 0.3             | 103          | 21.2                     | 16.3 $\pm$ 0.3             | 77           |
|              | 20.0                     | 18.0 $\pm$ 0.3             | 90           | 25.2                     | 20.5 $\pm$ 0.4             | 81           |
| 4            | 15.0                     | 16.7 $\pm$ 0.1             | 111          | 20.0                     | 11.9 $\pm$ 0.5             | 59           |
|              | 17.5                     | 17.56 $\pm$ 0.01           | 100          | 21.2                     | 12.3 $\pm$ 0.5             | 58           |
|              | 20.0                     | 19.27 $\pm$ 0.01           | 96           | 25.2                     | 18.0 $\pm$ 0.4             | 72           |

\*Found: [mean  $\pm$  SD, mM ( $n = 3$ ). [Se-BODIPY] = 20  $\mu\text{mol/L}$ , with 40% DMSO in Tris-HCl buffer pH 7.51.  $\lambda_{\text{abs}} = 496 \text{ nm}$ .

**Table S4.** The recovery values of spiked Cys and GSH in real human urine samples through R values obtained from pictures of paper discs impregnated with Se-BODIPY.

| Urine Sample | Cys         |               |              | GSH         |                |              |
|--------------|-------------|---------------|--------------|-------------|----------------|--------------|
|              | Spiked (mM) | Recovery (mM) | Recovery (%) | Spiked (mM) | Recovery (mM)  | Recovery (%) |
| Visible      | 2.5         | 2.5 $\pm$ 0.5 | 101          | 5.0         | 3.7 $\pm$ 0.2  | 74           |
|              | 5.0         | 5.4 $\pm$ 0.8 | 108          | 7.5         | 7.4 $\pm$ 0.3  | 99           |
|              | 7.5         | 6.3 $\pm$ 0.8 | 84           | 10.0        | 10.6 $\pm$ 0.3 | 106          |
| UV           | 2.5         | 2.5 $\pm$ 0.1 | 106          | 5.0         | 3.5 $\pm$ 0.2  | 70           |
|              | 5.0         | 5.3 $\pm$ 0.2 | 106          | 7.5         | 6.1 $\pm$ 0.3  | 81           |
|              | 7.5         | 8.0 $\pm$ 0.2 | 106          | 10.0        | 8.7 $\pm$ 0.3  | 87           |

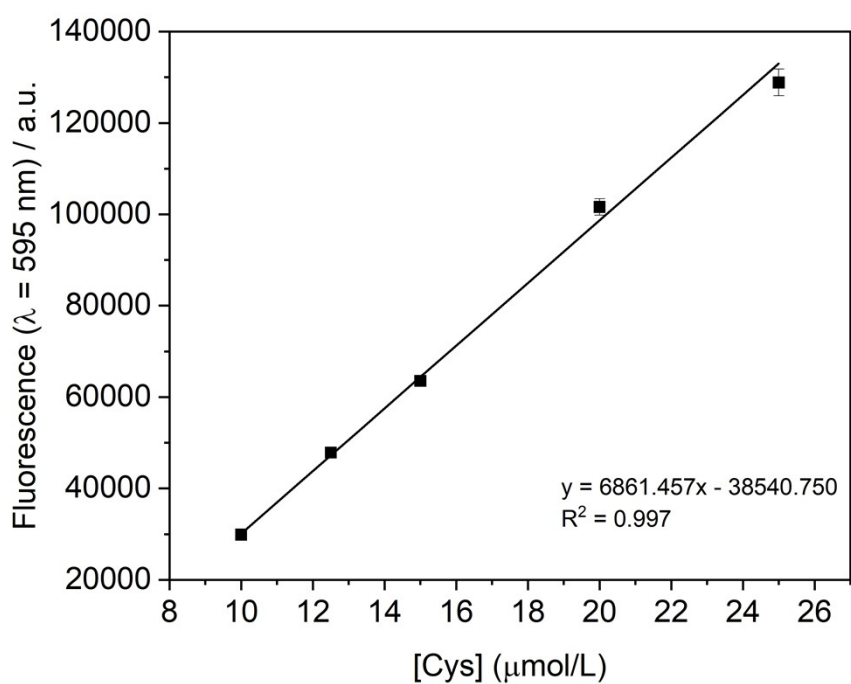

**Figure S19.** Calibration curve for Cys with Se-BODIPY as fluorescent probe used for obtaining the recovery values presented in the Table 1. Conditions: [Se-BODIPY] = 20 μmol/ L, with 40% DMSO in Tris-HCl buffer pH 7.5.  $\lambda_{\text{ex}} = 486 \text{ nm}$ ,  $\lambda_{\text{em}} = 595 \text{ nm}$ .

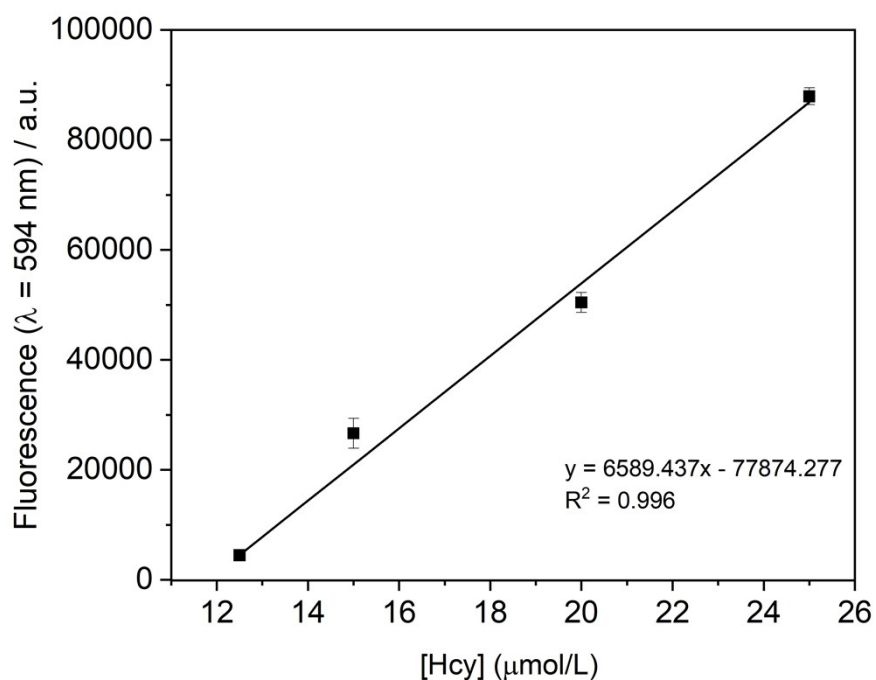

**Figure S20.** Calibration curve for Hcy with Se-BODIPY as fluorescent probe used for obtaining the recovery values presented in the Table 1. Conditions: [Se-BODIPY] = 20 μmol/L, with 40% DMSO in Tris-HCl buffer pH 7.5.  $\lambda_{\text{ex}} = 486 \text{ nm}$ ,  $\lambda_{\text{em}} = 594 \text{ nm}$ .

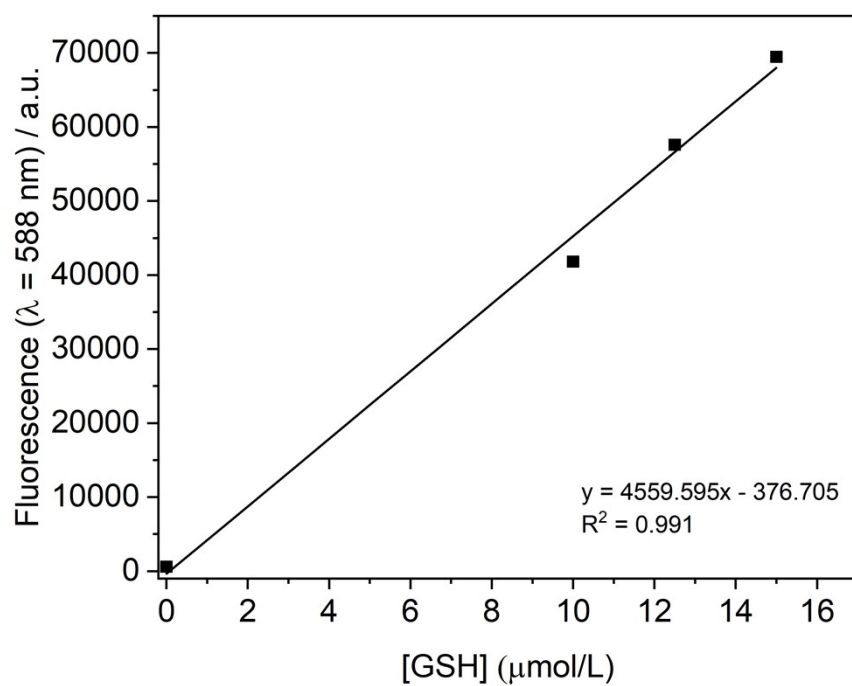

**Figure S21.** Calibration curve for GSH with Se-BODIPY as fluorescent probe used for obtaining the recovery values presented in the Table 1. Conditions: [Se-BODIPY] = 20 μmol/L, with 40% DMSO in Tris-HCl buffer pH 7.5.  $\lambda_{\text{ex}} = 540$ ,  $\lambda_{\text{em}} = 588$  nm.

### 3. Structural characterization of BODIPYs

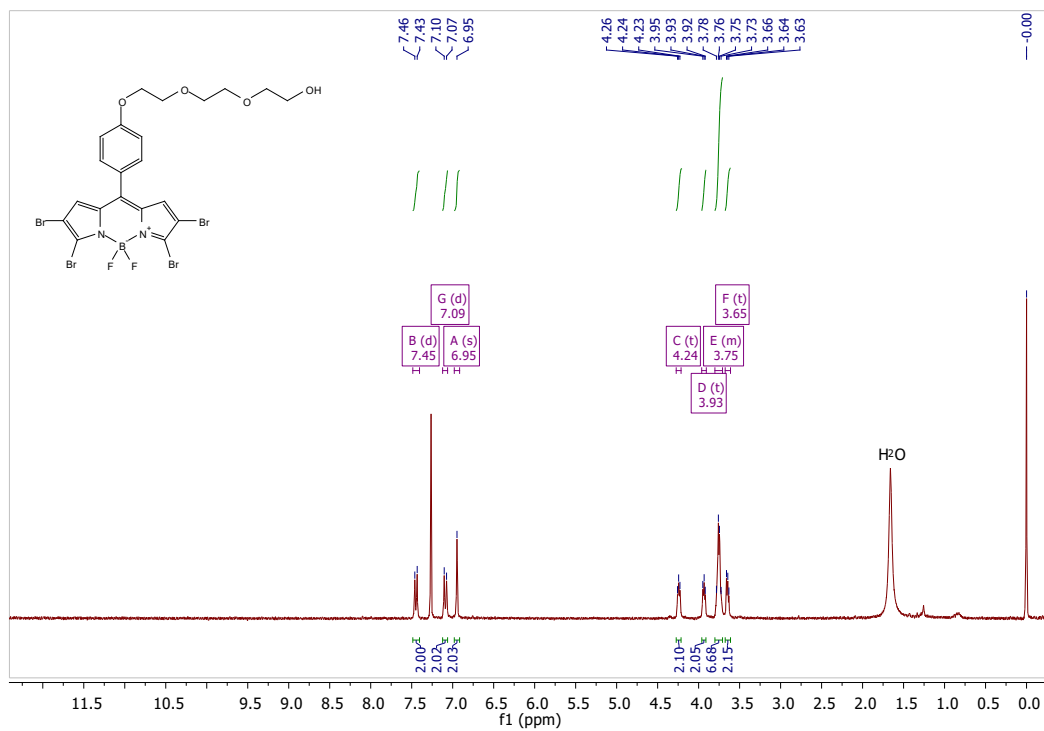

Figure. S22. <sup>1</sup>H NMR spectra (300 MHz) of BODIPY 2 in CDCl<sub>3</sub>.

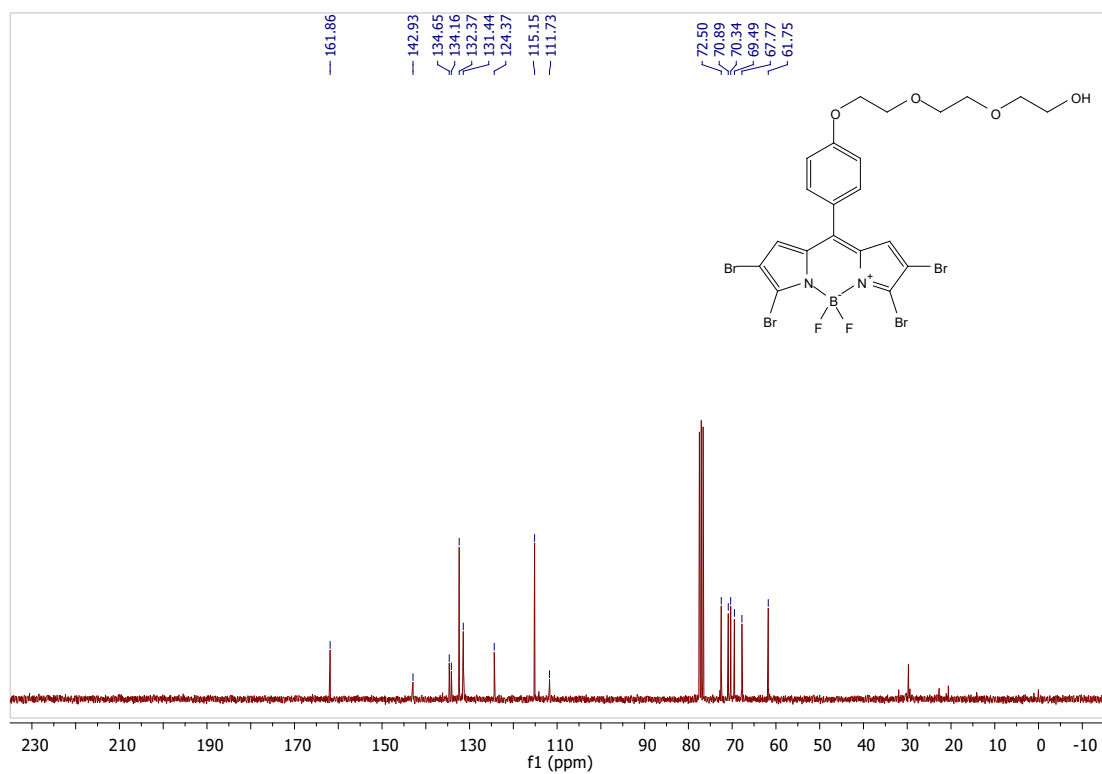

Figure. S23. <sup>13</sup>C NMR spectra (75 MHz) of BODIPY 2 in CDCl<sub>3</sub>.



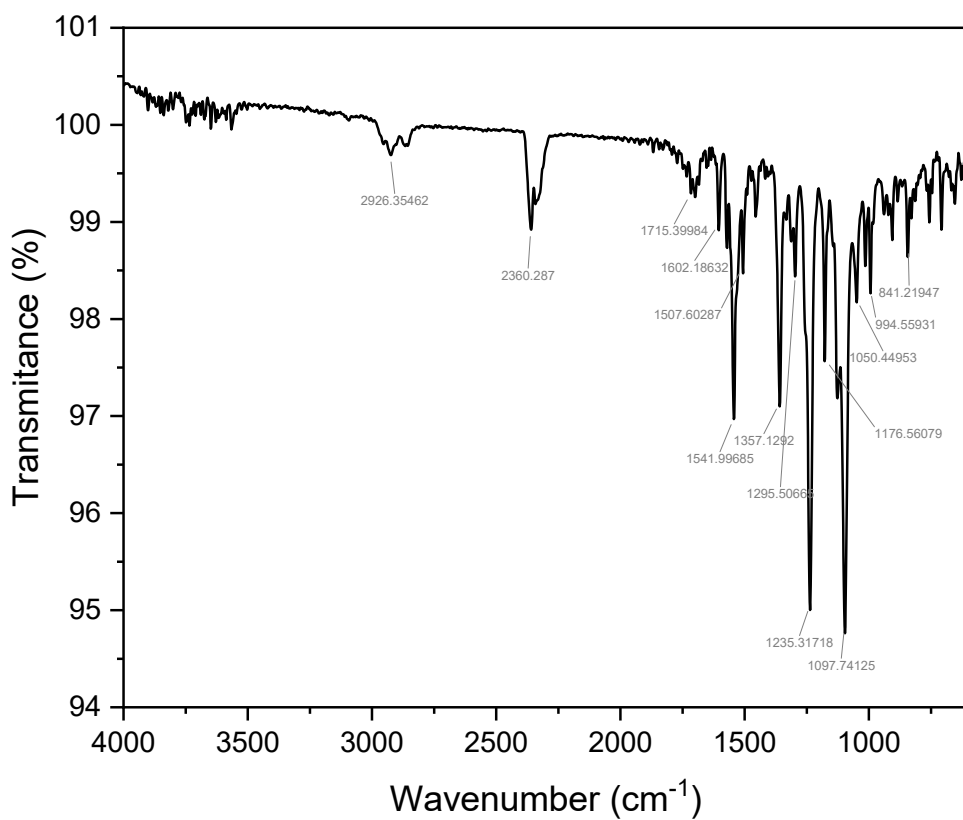

**Figure. S24.** IR of BODIPY 2.

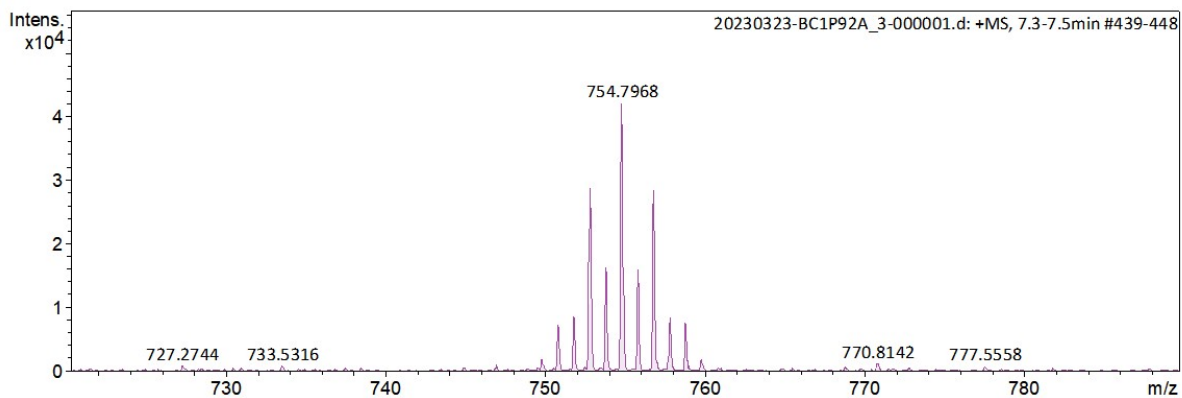

**Figure. S25.** HRMS of BODIPY 2.

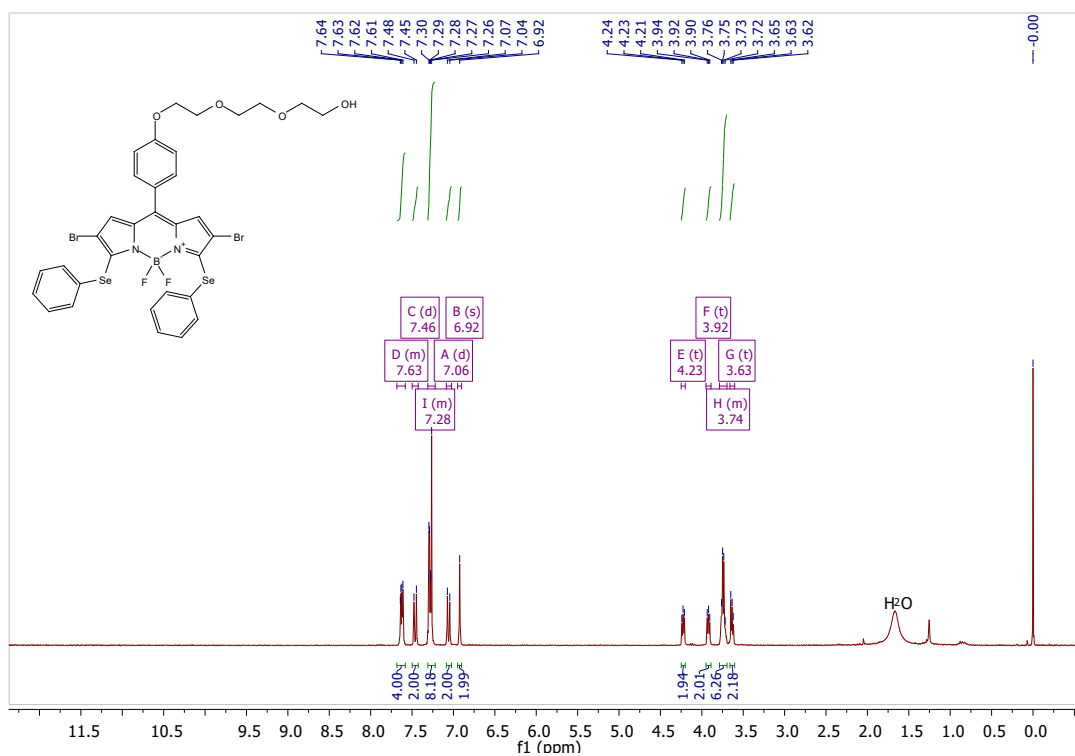

Figure. S26. <sup>1</sup>H NMR spectra (300 MHz) of Se-BODIPY in CDCl<sub>3</sub>.

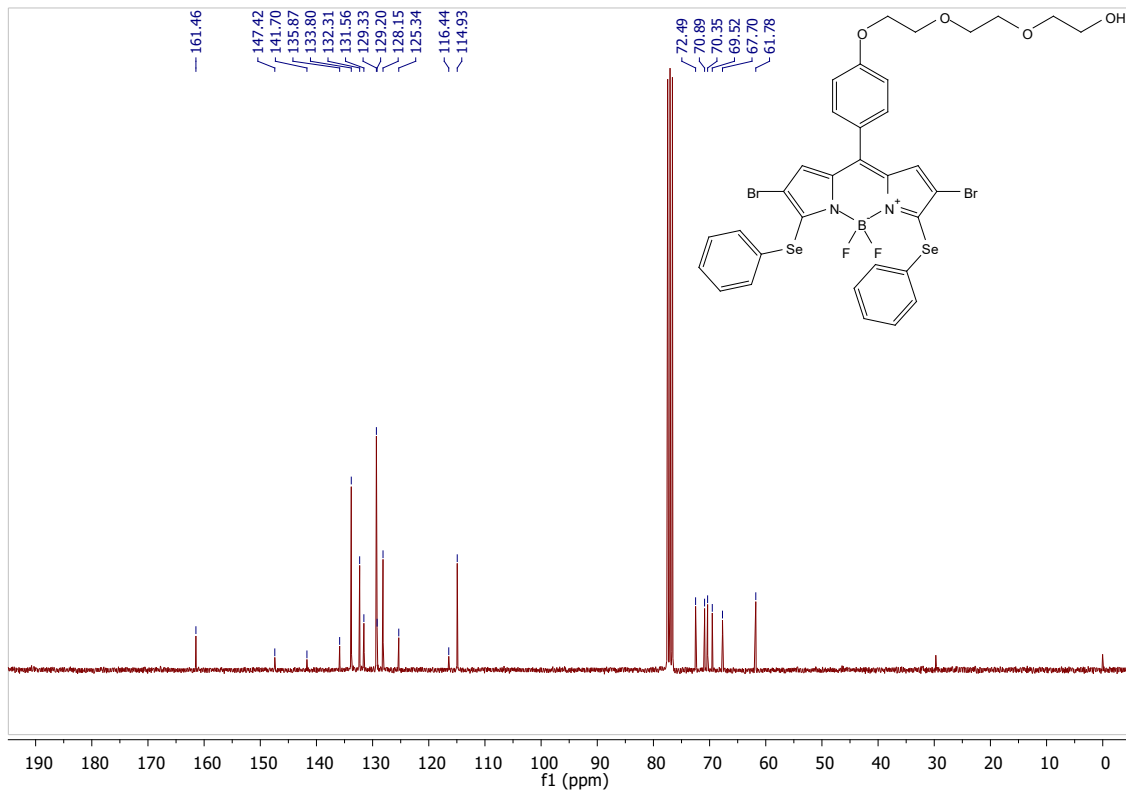

Figure. S27. <sup>13</sup>C NMR spectra (75 MHz) of Se-BODIPY in CDCl<sub>3</sub>.

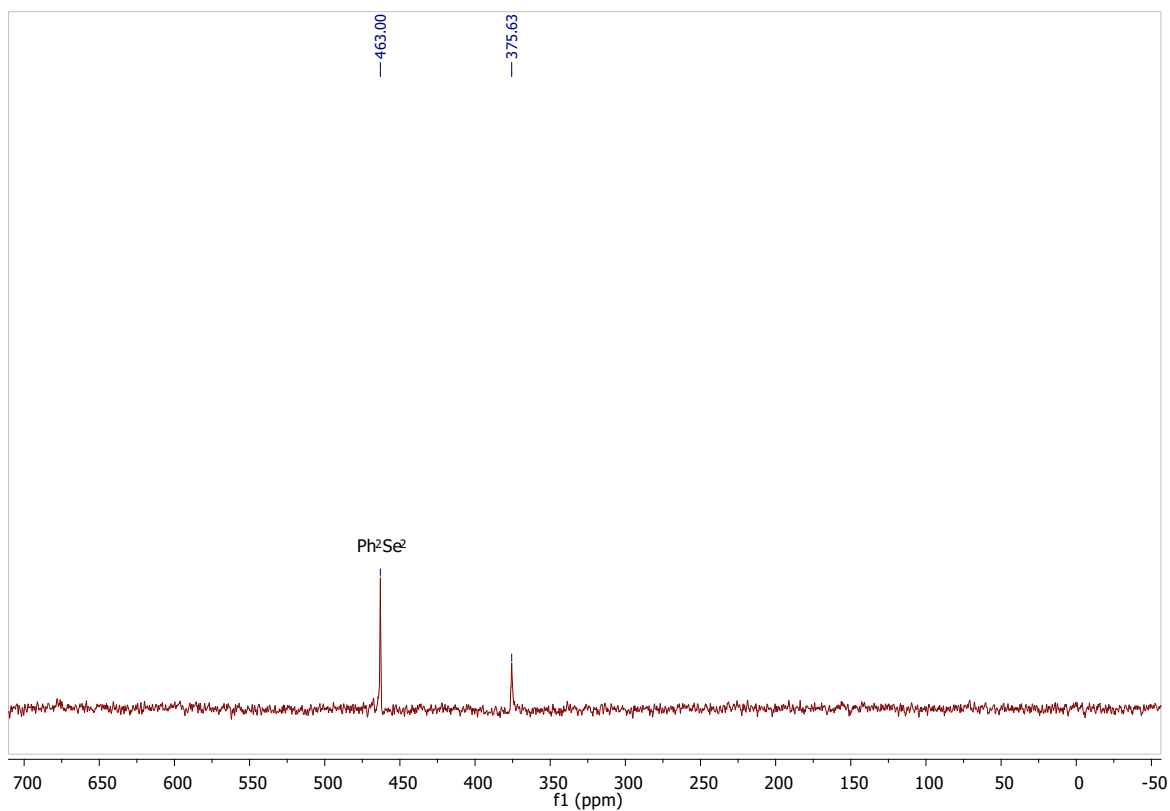

**Figure. S28.** HRMS of Se-BODIPY using Ph<sub>2</sub>Se<sub>2</sub> as an external standard.

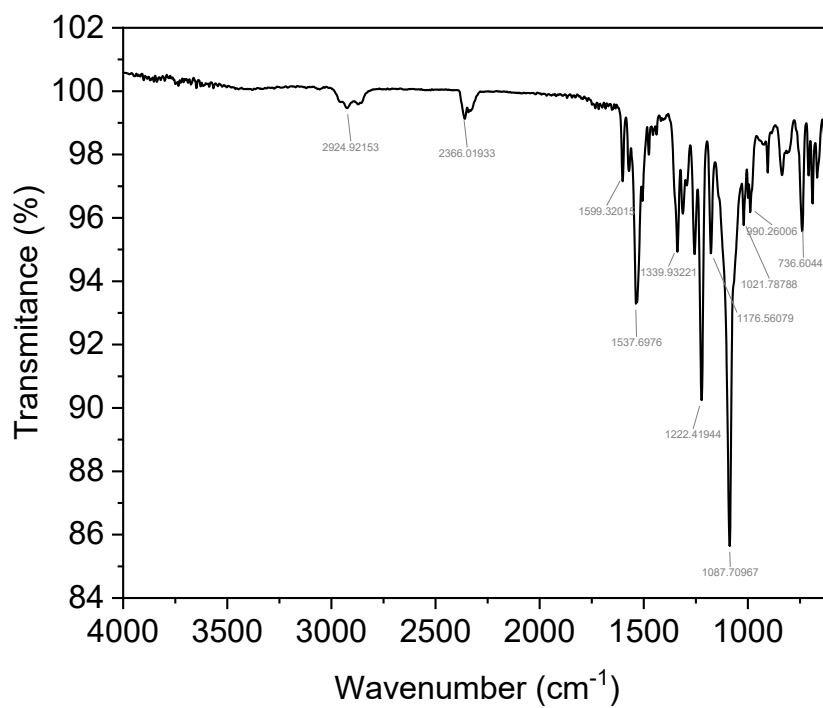

**Figure. S29.** IR of Se-BODIPY.

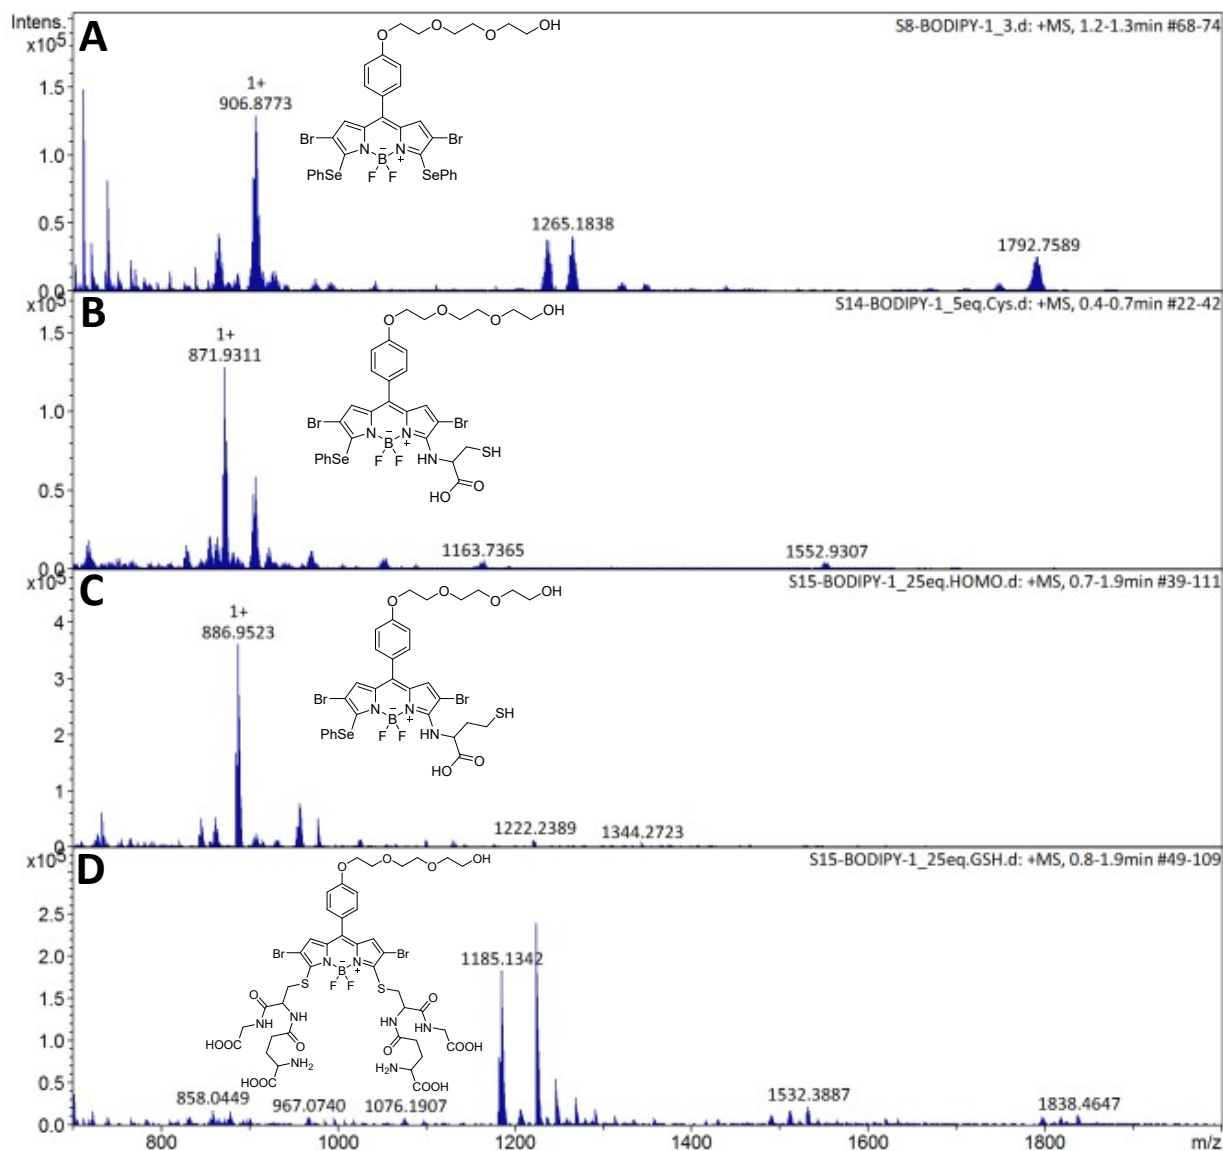

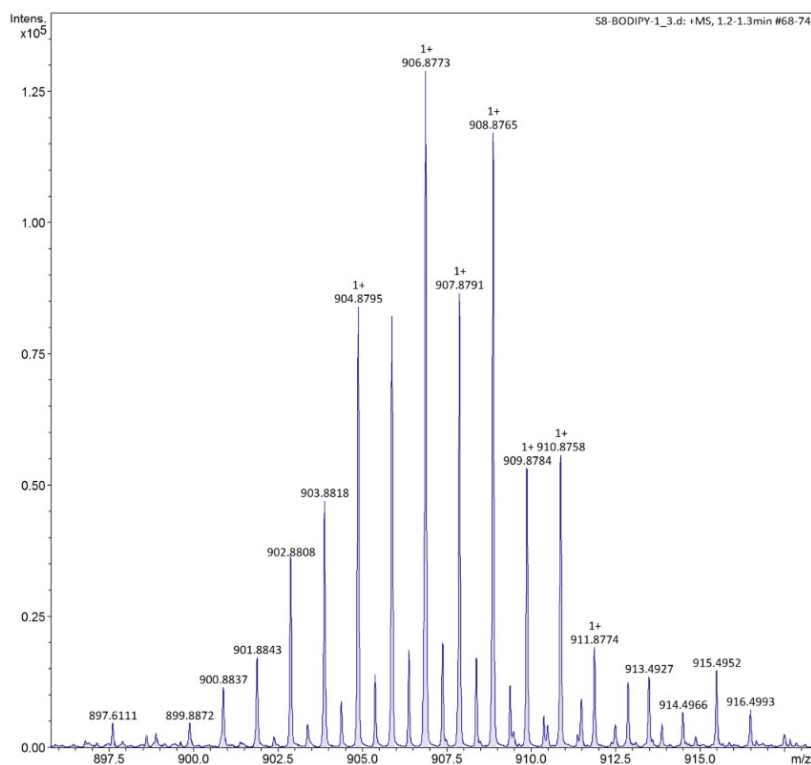

**Figure. S31.** HRMS of Se-BODIPY. HRMS  $m/z$   $[M + Na]^+$  for  $C_{33}H_{29}BBr_2F_2N_2O_4Se_2 = 906.8773$  (-1.1 ppm). Calculated  $[M + Na]^+$  for  $C_{33}H_{29}BBr_2F_2N_2O_4Se_2 = 906.878258$ .

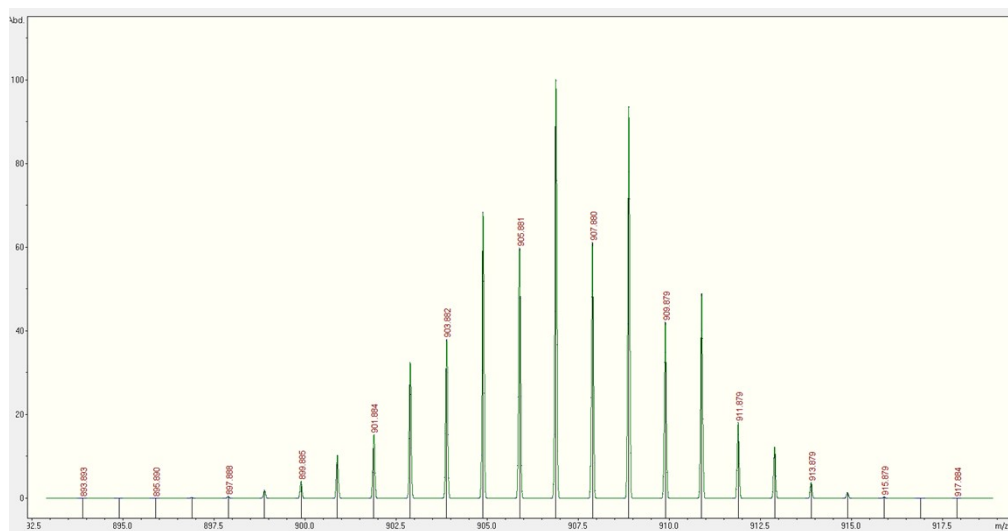

**Figure. S32.** Theoretical isotopic pattern for Se-BODIPY, obtained by software Compass IsotopePattern. HRMS ( $m/z$ ) for  $C_{33}H_{29}BBr_2F_2N_2O_4Se_2$ :  $[M+Na]^+ = 906.878258$ .

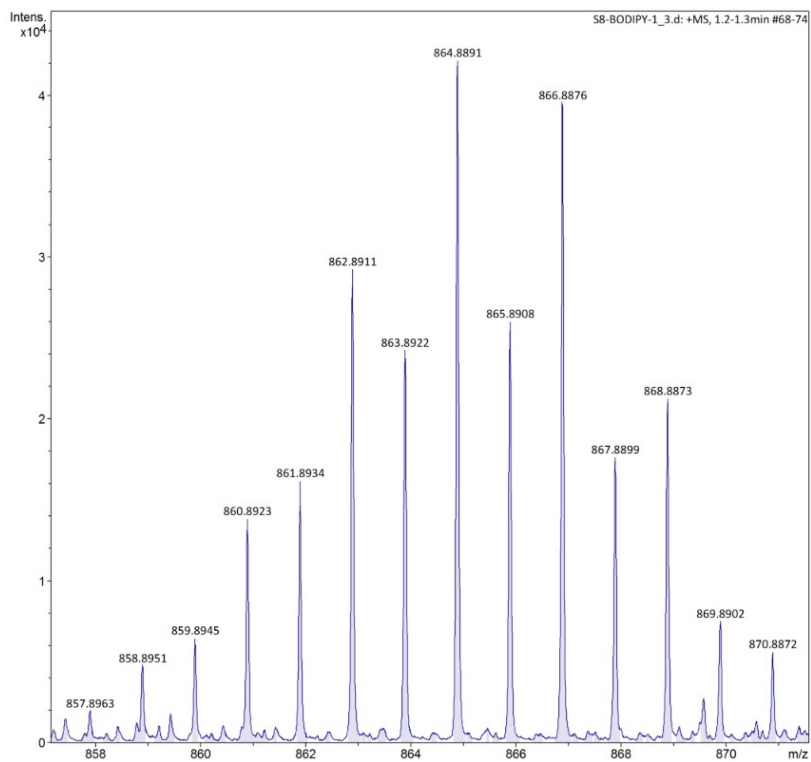

**Figure. S33.** HRMS of a fragment of **Se-BODIPY**. HRMS  $m/z$   $[M]^+$  for  $C_{33}H_{29}BBr_2FN_2O_4Se_2$  = 864.8891 (-1.1 ppm). Calculated  $[M]^+$  for  $C_{33}H_{29}BBr_2FN_2O_4Se_2$  = 864.890085.

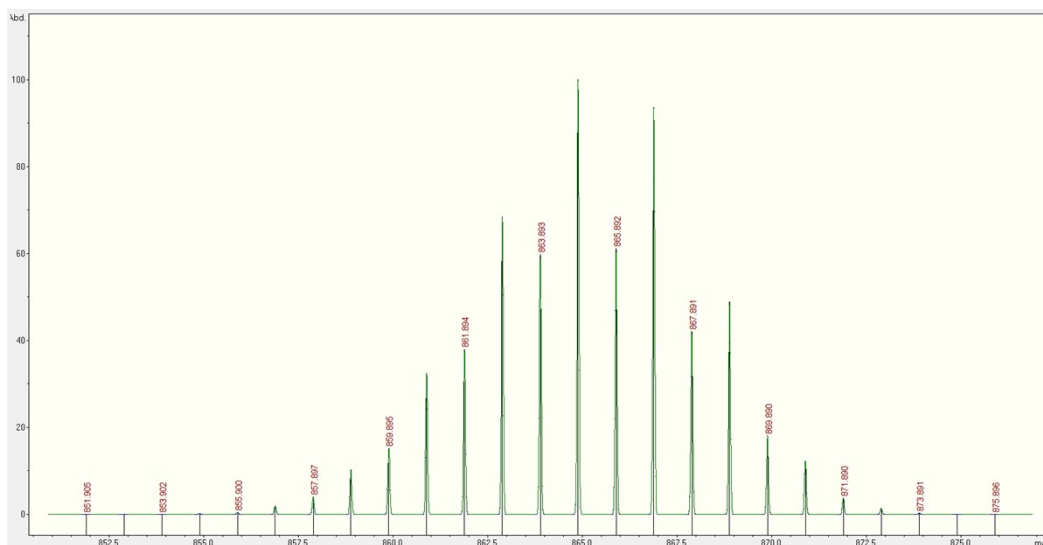

**Figure. S34.** Theoretical isotopic pattern for **Se-BODIPY**, obtained by software Compass IsotopePattern. HRMS ( $m/z$ ) for  $C_{33}H_{29}BBr_2FN_2O_4Se_2$ :  $[M]^+$  = 864.890085.

#### 4. References

- 1 U. Lee, T. Il Kim, S. Jeon, Y. Luo, S. Cho, J. Bae and Y. Kim, *Chemistry - A European Journal*, 2021, **27**, 12545–12551.
- 2 Q. H. Wan, M. Gu, W. J. Shi, Y. X. Tang, Y. Lu, C. Xu, X. S. Chen, X. T. Wu, L. Gao, D. X. Han and L. Niu, *Talanta*, , DOI:10.1016/j.talanta.2023.125251.
- 3 Y. Zhang, J. Zhang, M. Su and C. Li, *Biosens Bioelectron*, , DOI:10.1016/j.bios.2020.112866.
- 4 X. Ji, N. Wang, J. Zhang, S. Xu, Y. Si and W. Zhao, *Dyes and Pigments*, , DOI:10.1016/j.dyepig.2020.109089.
- 5 X. Yang, J. Wang, Z. Zhang, B. Zhang, X. Du, J. Zhang and J. Wang, *Food Chem*, , DOI:10.1016/j.foodchem.2023.135730.
- 6 X. Liu, H. Wei, M. Yan, G. Hai, Q. Li, R. Yan, S. Zhao, X. Zhao, X. Sun and T. Zhang, *Chem Biodivers*, , DOI:10.1002/cbdv.202100862.
- 7 X. Hu, R. Duan, J. Wang, M. Li, H. Chen, J. Zhang and L. Zeng, *Spectrochim Acta A Mol Biomol Spectrosc*, , DOI:10.1016/j.saa.2024.125098.
- 8 Y. Xu, J. Wang, R. Han, X. Du, X. Hai, J. Zhang and J. Wang, *Food Chem*, , DOI:10.1016/j.foodchem.2024.141044.
- 9 M. Kumar, G. Chaudhary and A. P. Singh, *Analytical Sciences*, 2021, **37**, 283–292.
- 10 Y. Mei and Q. H. Song, *J Mater Chem B*, 2022, **10**, 6009–6017.
- 11 K. C. Behera, P. Pushpanandan and M. Ravikanth, *Eur J Inorg Chem*, , DOI:10.1002/ejic.202300039.
- 12 L. Jia, L. Y. Niu and Q. Z. Yang, *Anal Chem*, 2020, **92**, 10800–10806.
- 13 Y. Tao, X. Ji, J. Zhang, Y. Jin, N. Wang, Y. Si and W. Zhao, *ChemBioChem*, 2020, **21**, 3131–3136.
- 14 N. Wang, M. Chen, J. Gao, X. Ji, J. He, J. Zhang and W. Zhao, *Talanta*, 2019, **195**, 281–289.
- 15 J. Gao, Y. Tao, N. Wang, J. He, J. Zhang and W. Zhao, *Spectrochim Acta A Mol Biomol Spectrosc*, 2018, **203**, 77–84.
- 16 F. F. Wang, Y. J. Liu, B. B. Wang, L. X. Gao, F. L. Jiang and Y. Liu, *Dyes and Pigments*, 2018, **152**, 29–35.
